# Supplementary material for: Ruptured liquid metal microcapsules enabling hybridized silver nanowire networks towards high-performance deformable transparent conductors
Source: Royal Society of Chemistry journal article supplement (doi:10.1039/d3nr06508a), 2024-01-01
Supplement: d3nr06508a1.pdf [file d3nr06508a1.pdf]

# **Ruptured Liquid Metal Microcapsules Enabling Hybridized Silver Nanowire Networks Towards High-Performance Deformable Transparent Conductors**

*Shipeng Wang<sup>1</sup>¶, Huaisen Tian<sup>1</sup>¶, Yawen Wang<sup>2</sup>, Haojie Zuo<sup>2</sup>, Chengliang Tao<sup>1</sup>, Jiawei Liu<sup>1</sup>, Pengyuan Li<sup>1</sup>, Yan Yang<sup>1</sup>, Xu Kou<sup>1</sup>, Jiangxin Wang<sup>1\*</sup>, Wenbin Kang<sup>2\*</sup>*

<sup>1</sup> School of Mechanical Engineering, Sichuan University, Chengdu 610065, China

<sup>2</sup> State Key Laboratory of Environment-Friendly Energy Materials, Southwest University of Science and Technology, Mianyang, 621010, China

¶ These authors contributed equally to this manuscript

\* Corresponding Email: [wenbin.kang@swust.edu.cn](mailto:wenbin.kang@swust.edu.cn); [wangjiangxin@scu.edu.cn](mailto:wangjiangxin@scu.edu.cn)

**Supplementary Information**

**Table S1 List of representative welding treatment methods**

| Method                                 | Features                                                                                                    | $R_s$ (ohm<br>$\text{sq}^{-1}$ ),<br>before | $R_s$ (ohm<br>$\text{sq}^{-1}$ ),<br>after | T<br>(%) | Tran<br>sfer-<br>free | Mechanical<br>and<br>Chemical<br>Enhancement | Ref |
|----------------------------------------|-------------------------------------------------------------------------------------------------------------|---------------------------------------------|--------------------------------------------|----------|-----------------------|----------------------------------------------|-----|
| Heat treatment                         | Low consumption, fast,<br>precise temperature<br>control, unsuitable for<br>heat-sensitive substrates       | 30                                          | 10                                         | 85       | N                     | N                                            | 1   |
| Chemically<br>welding                  | Energy-saving, large-<br>scale fabrication, adding<br>additional material                                   | $7.06 \times 10^3$                          | 11.2                                       | 72       | N                     | N                                            | 2   |
| Plasmonic<br>treatment                 | Low temperature, fast,<br>specialized equipment                                                             | 120                                         | 19                                         | 98       | N                     | N                                            | 3   |
| Mechanical<br>pressing                 | Cold welding, simple,<br>high pressure, damage to<br>the device structure                                   | $1.8 \times 10^4$                           | 8.6                                        | -        | N                     | N                                            | 4   |
| Capillary-force-<br>induced<br>welding | Room temperature,<br>simple, efficiently,<br>specific hydrophobic<br>substrates and solution<br>viscosities | $7 \times 10^3$                             | 150                                        | 83       | N                     | N                                            | 5   |
| Laser nano-<br>welding                 | Fast-process, efficiently,<br>expensive equipment,<br>unsuitable for large-scale<br>manufacturing           | 87                                          | 25                                         | 94       | N                     | N                                            | 6   |
| Atomic layer<br>deposition             | Specific equipment,<br>complex process<br>conditions, unsuitable for<br>large-scale<br>manufacturing        | 75                                          | 9                                          | 72       | Y                     | -                                            | 7   |
| This work                              | Room temperature, fast,<br>energy-saving                                                                    | 132                                         | 10                                         | 74       | Y                     | Y                                            |     |

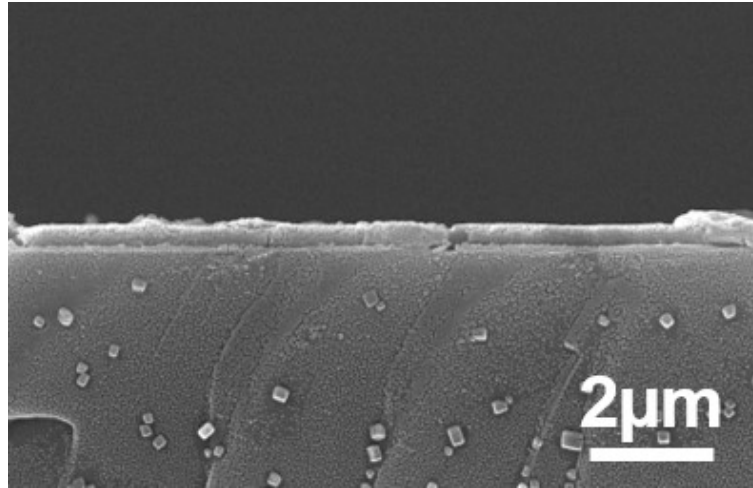

**Fig. S1.** The SEM image of the cross-sectional view of the electrode to identify the thickness of the liquid metal overlay.

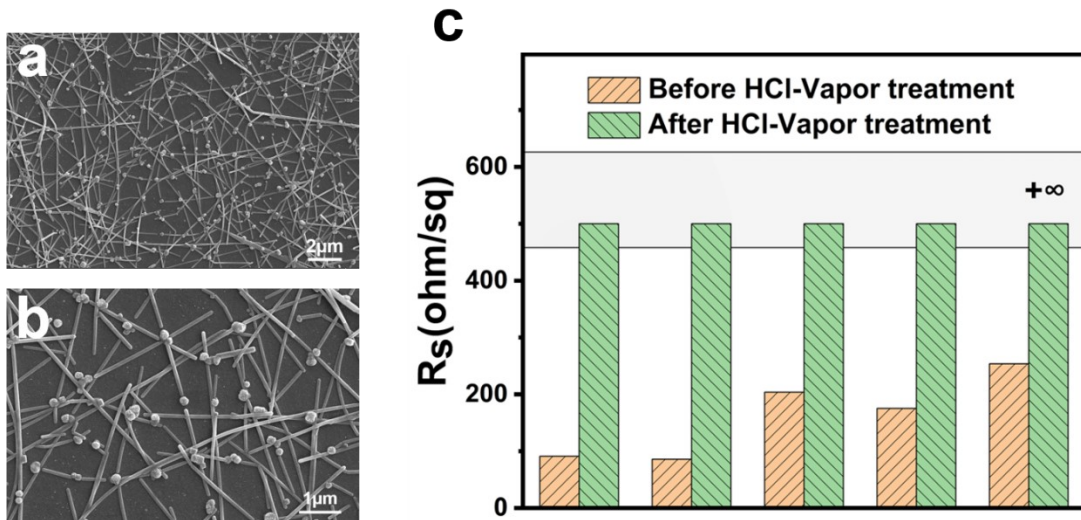

**Fig. S2.** (a, b) SEM images of AgNWs network after HCl-vapor treatment. (c) The sheet resistance of AgNWs network before and after HCl-vapor treatment.

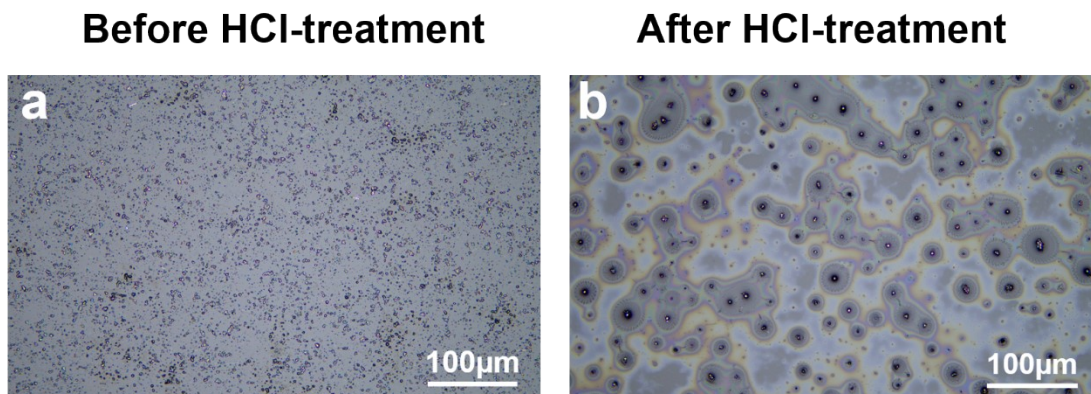

**Fig. S3.** (a) LMMs distributed on glass substrate before HCl-vapor treatment. (b) LMMs distributed on glass substrate after HCl-vapor treatment.

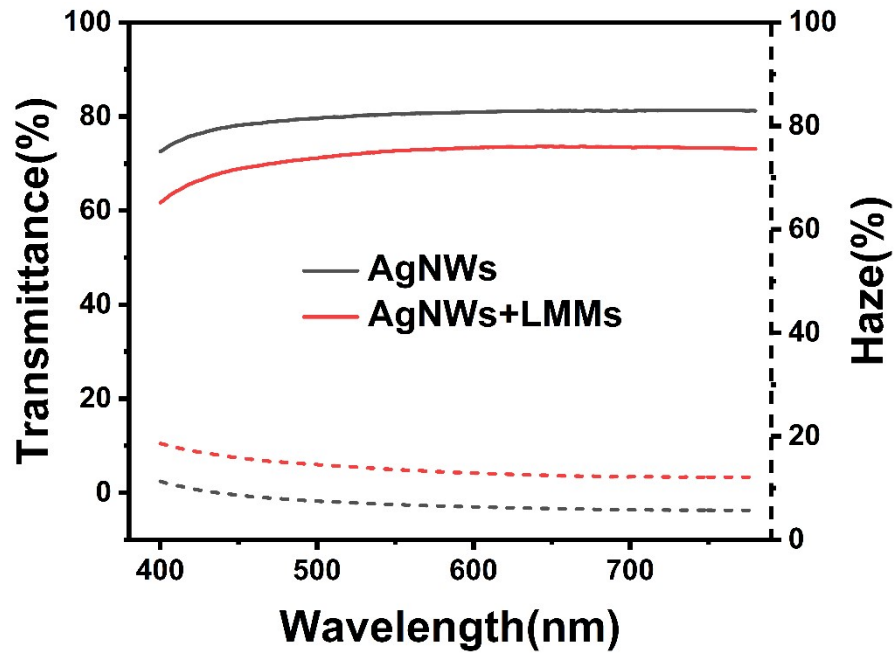

**Fig. S4.** Transmittance and haze curves of transparent conductors before and after spraying LMMs.

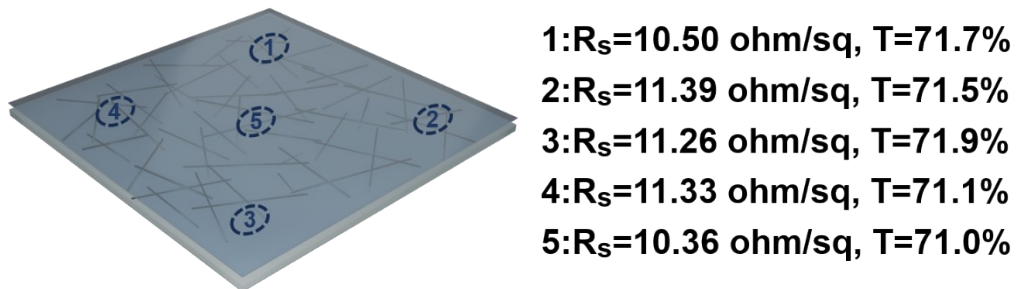

**Fig. S5.** Sheet resistance and transmittance at different positions of AgNWs-LM conductor.

**Table S2 List of sheet resistances of the samples for testing**

| Testing name               | Figure number  | Sheet resistance (ohm sq <sup>-1</sup> ) |
|----------------------------|----------------|------------------------------------------|
| chemical stability testing | Fig 2d         | 10~15                                    |
| tape testing               | Fig 2e         | 8.34                                     |
| ultrasound testing         | Fig 2f, Fig 2g | 11.48 and 12.39                          |
| cyclic bending test        | Fig 2h         | 12.74                                    |
| comparison test with ITO   | Fig 2i         | 18.65                                    |
| The strain sensor          | Fig 4          | 10~15                                    |

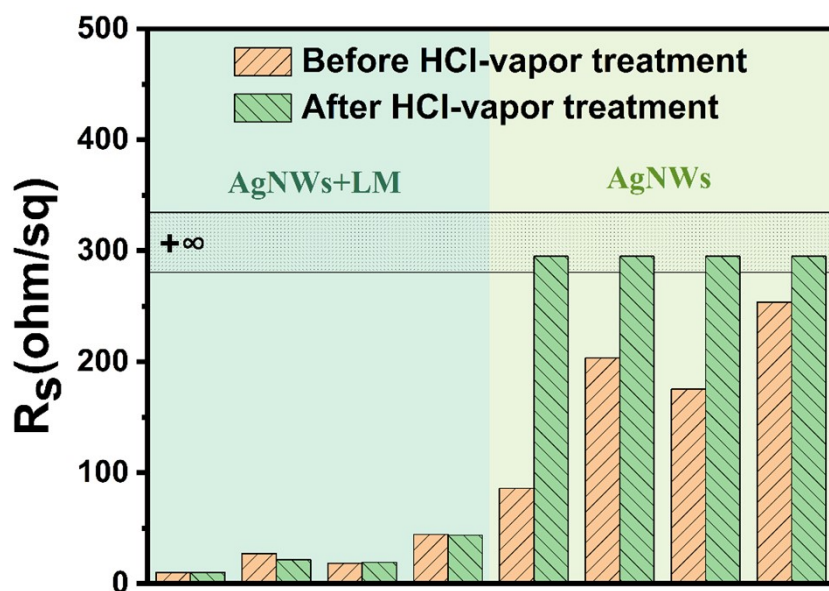

**Fig. S6.** The sheet resistance of AgNWs-LM conductor and AgNWs network before and after HCl-vapor treatment.

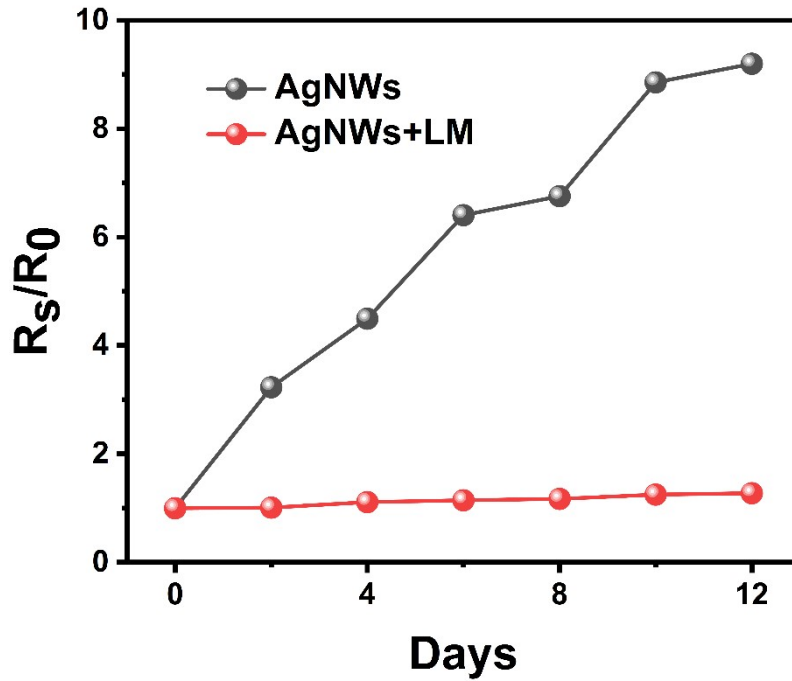

**Fig. S7.** Conductivity stability of AgNWs-LM and AgNWs conductors in ambient air.

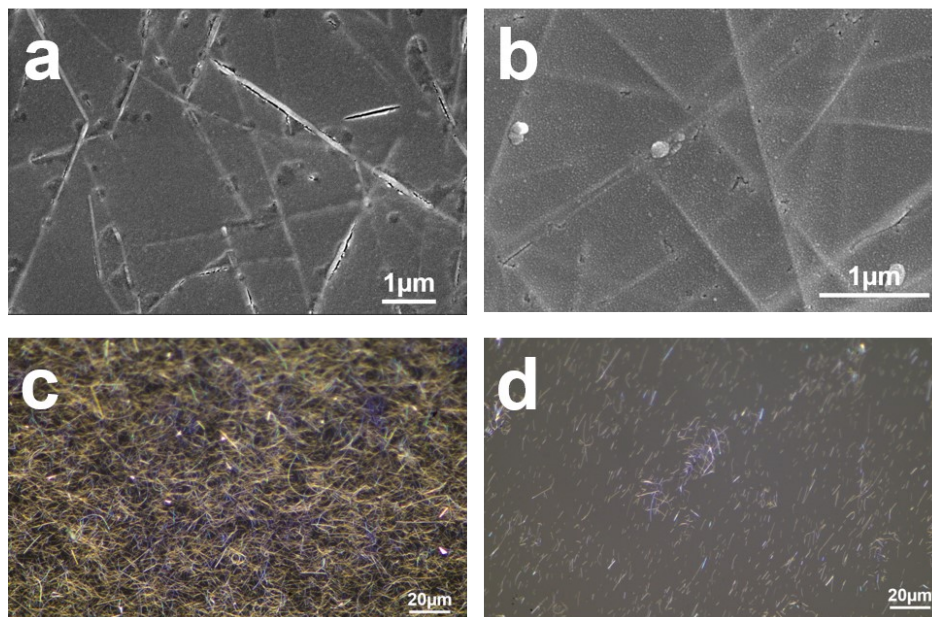

**Fig. S8.** (a, b) The SEM images of the surface of AgNWs-LM conductor before and after adhesion test. (c, d) The optical microscope images of the surface of AgNWs networks before and after adhesion test.

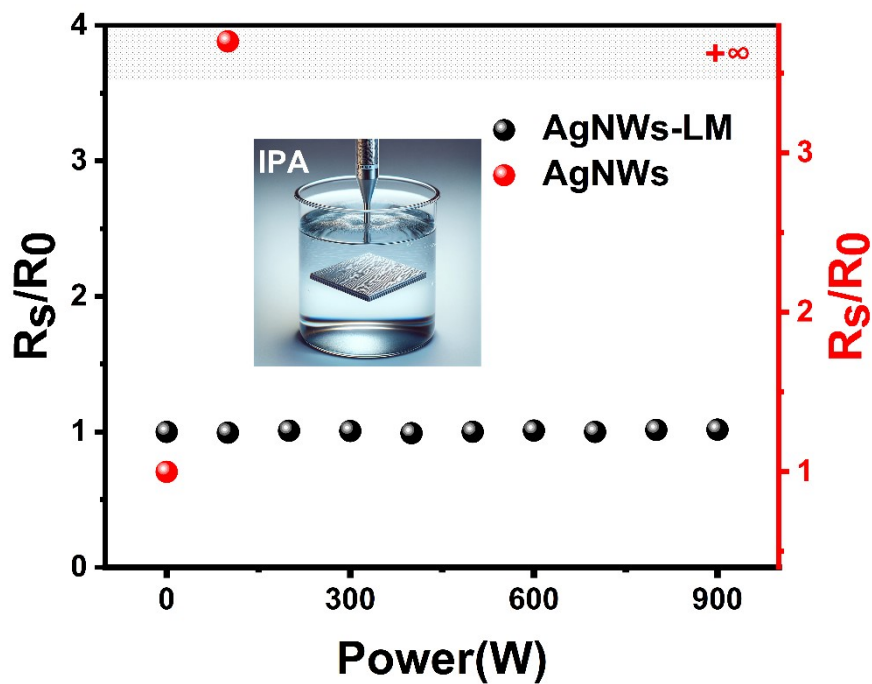

**Fig. S9.** The sheet resistance variation of the AgNWs-LM conductor after 60 seconds of ultrasonic treatment at varying power levels in IPA.

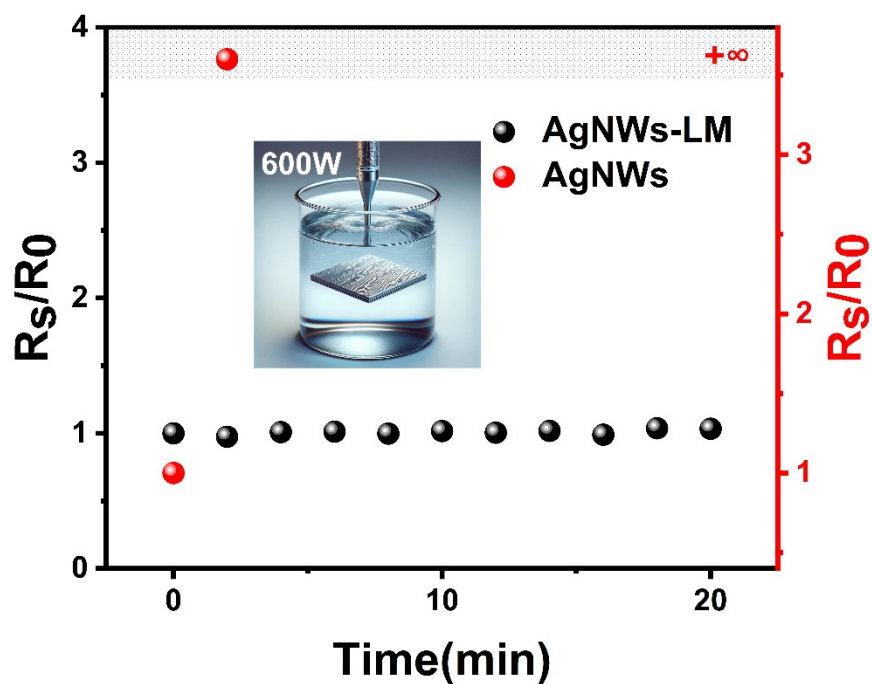

**Fig. S10.** The sheet resistance variation of the AgNWs-LM conductor under 600 W ultrasonic treatment in 20 mins in IPA.

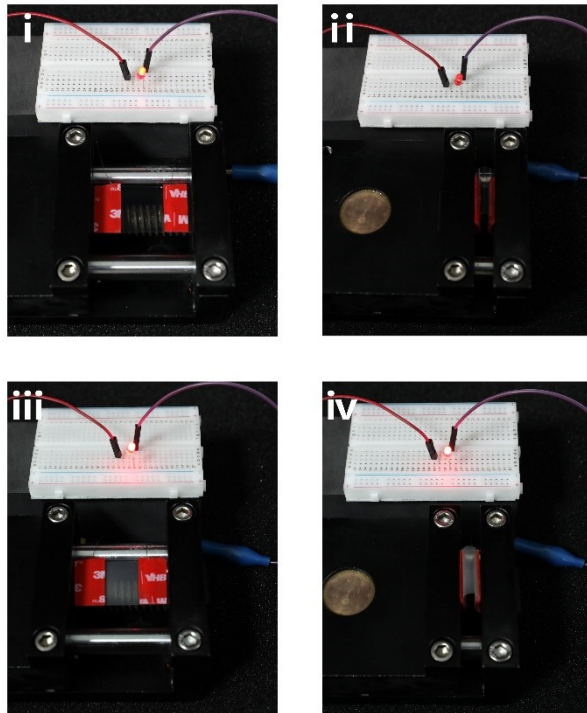

**Fig. S11.** Photographs of a powered LED integrated with the ITO and AgNWs-LM conductor under different bending radius.

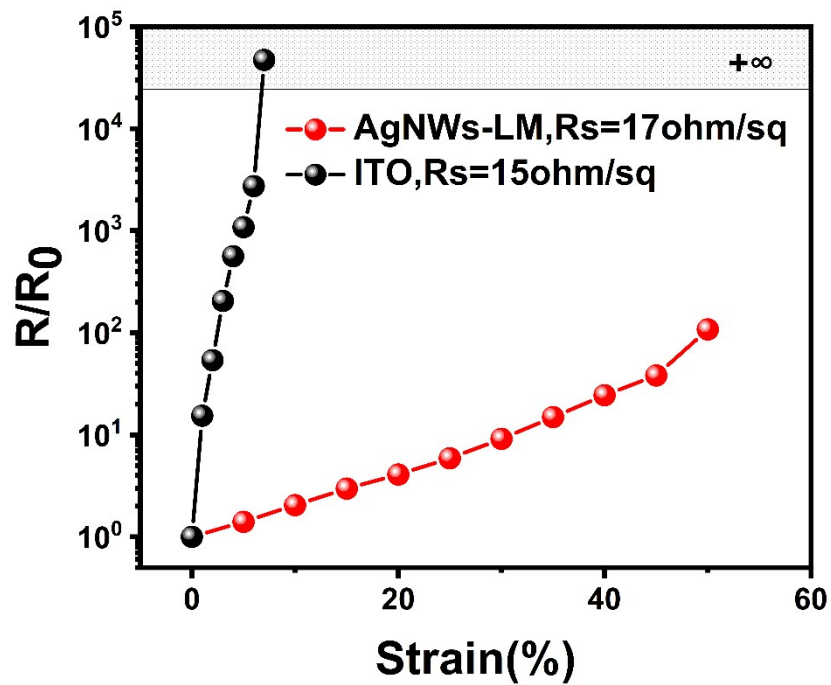

**Fig. S12.** The resistance changes of ITO and AgNWs-LM conductor under stretching.



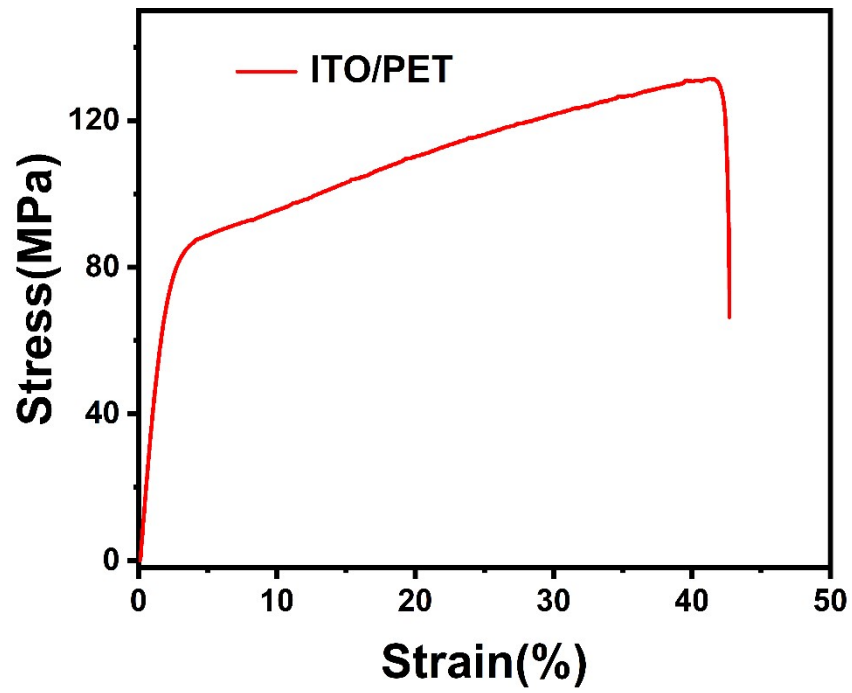

Fig. S13. The stress-strain curve of ITO/PET.

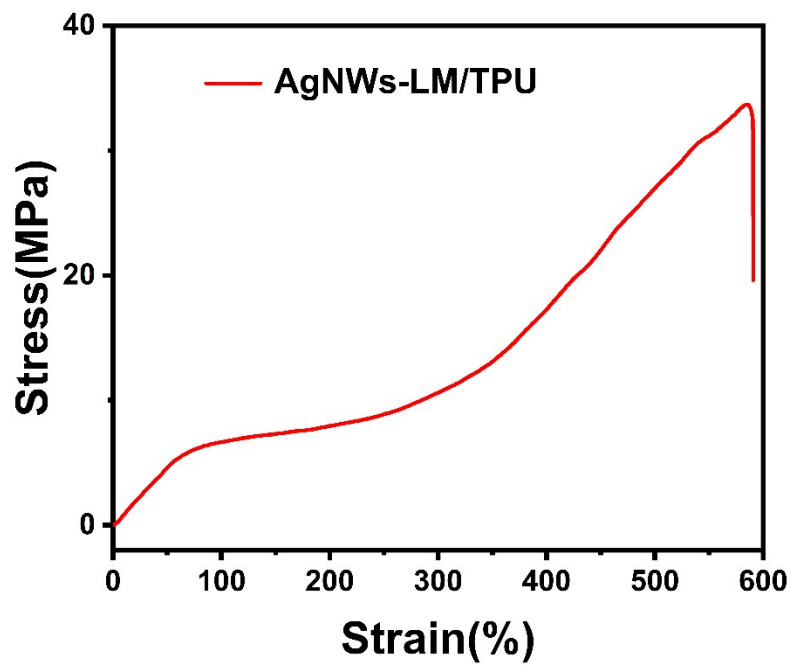

Fig. S14. The stress-strain curve of AgNWs-LM/TPU.

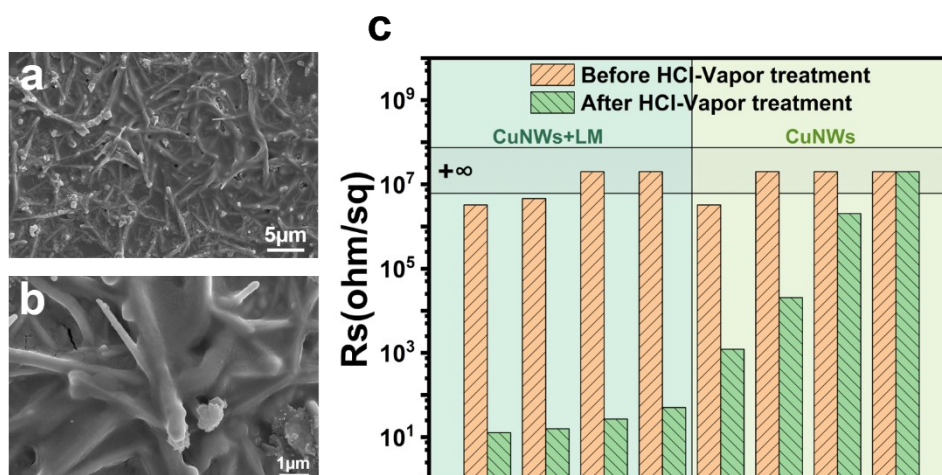

**Fig. S15.** (a, b) SEM images of liquid metal wetted with copper nanowires after HCl-vapor treatment. (c) Sheet resistance of CuNWs-LM conductor and CuNWs network before and after HCl-vapor treatment.

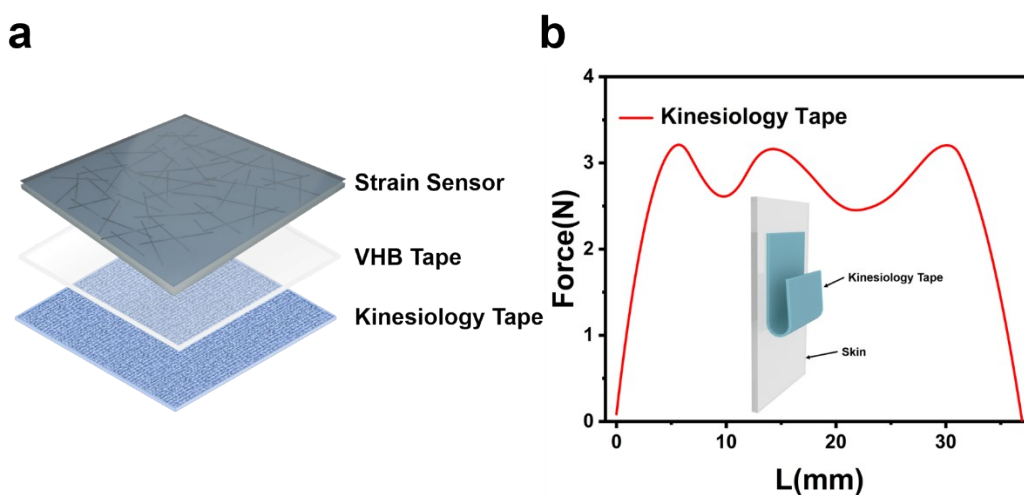

**Fig. S16.** (a) The structure of the strain sensor. (b) The peel test curve of kinesiology tape.

## References

1. A. Teymouri, S. Pillai, Z. Ouyang, X. Hao, F. Liu, C. Yan and M. A. Green, *ACS Appl. Mater. Interfaces*, 2017, **9**, 34093-34100.
2. L. Lian, X. Xi, D. Dong and G. He, *Org. Electron.*, 2018, **60**, 9-15.
3. J. H. Park, G. Hwang, S. Kim, J. Seo, H. Park, K. Yu, T. Kim and K. J. Lee, *Adv. Mater.*, 2017, **29**, 1603473.
4. T. Tokuno, M. Nogi, M. Karakawa, J. Jiu, T. T. Nge, Y. Aso and K. Suganuma, *Nano Res.*, 2011,

4, 1215-1222.

5. Y. Liu, J. Zhang, H. Gao, Y. Wang, Q. Liu, S. Huang, C. F. Guo and Z. Ren, *Nano Lett.*, 2017, **17**, 1090-1096.

6. J. Ha, B. J. Lee, D. J. Hwang and D. Kim, *RSC Adv.*, 2016, **6**, 86232-86239.

7. Y. Weng, G. Chen, X. Zhou, Y. Zhang, Q. Yan and T. Guo, *J. Mater. Sci.*, 2023, **58**, 17816-17828.
